# Supplementary material for: Gut Microbiome Changes Associated with Epithelial Barrier Damage and Systemic Inflammation during Antiretroviral Therapy of Chronic SIV Infection
Source: MDPI journal article supplement (doi:10.3390/v13081567), 2021-08-08
Supplement: s1 [file s1]

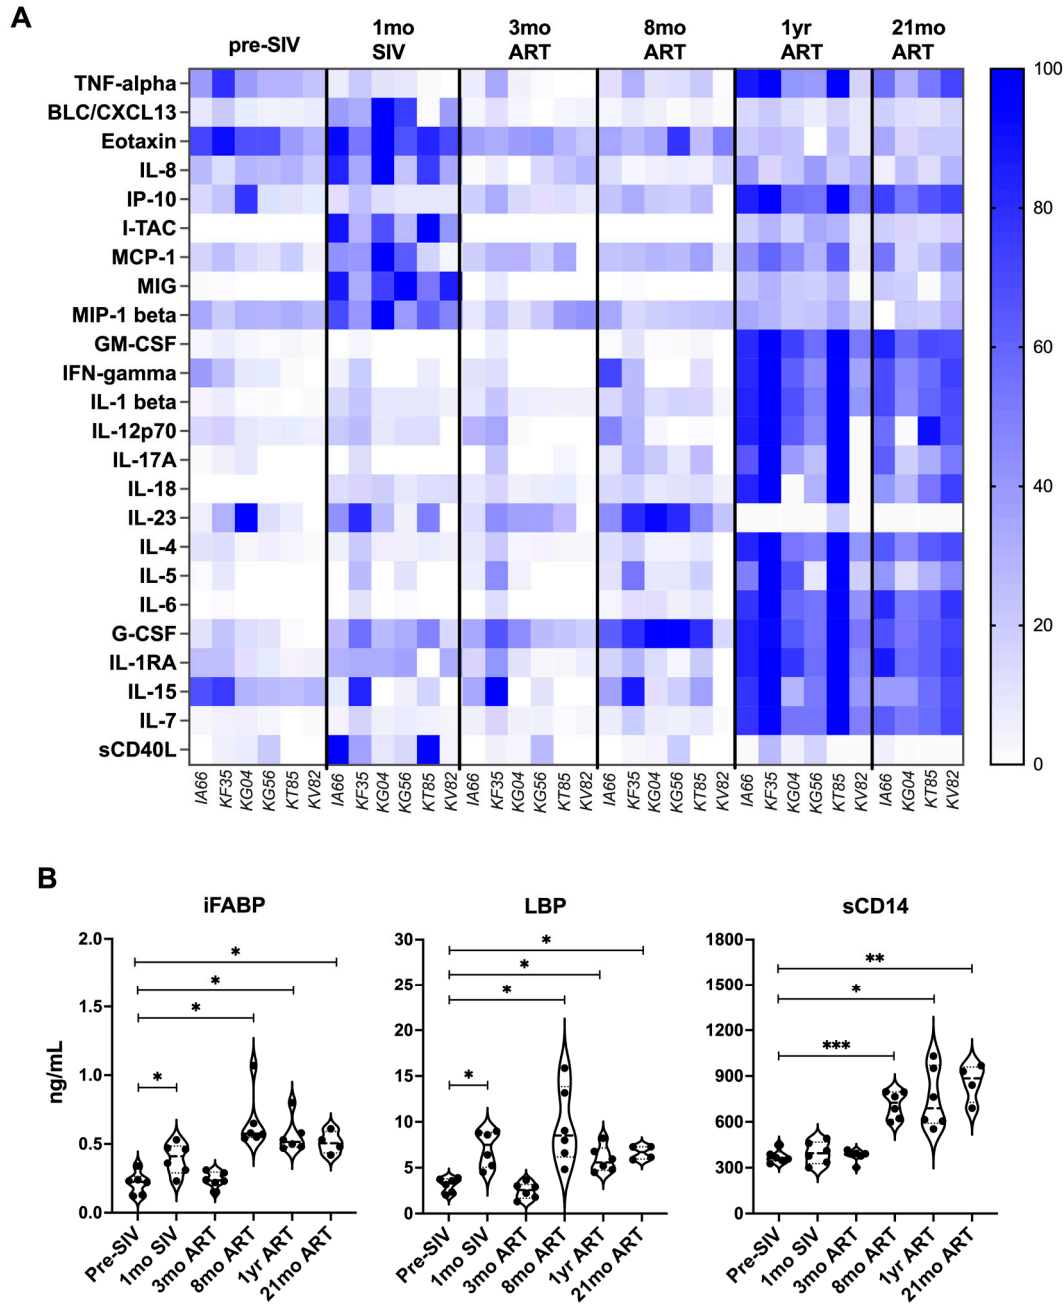

**Figure S1.** Plasma levels of cytokines and chemokines and IEBD/MT biomarkers during SIV infection and long-term ART. **(A)** Heat map of longitudinal plasma levels of proinflammatory cytokines measured by multiplexed-bead assay in the 6 SIV-infected rhesus macaques. Rows represent each analyte and columns represent each animal at indicated time points. Average cytokine concentration of two technical replicates in pg/ml was normalized to the range for each individual marker so that the fold change represented by each color is consistent across markers. White = lowest value, Blue = highest value for each marker. **(B)** Longitudinal plasma levels of IFABP, LBP, and sCD14 measured by ELISA through the course of ART-suppressed SIV infection. One-way ANOVA with Dunnett's multiple comparisons test was used to determine significant differences from baseline. Asterisks in all panels indicate significant differences between time points (\* $p < 0.05$ ; \*\* $p < 0.01$ ; \*\*\* $p < 0.001$ ).
